# Supplementary material for: Simultaneous utilization of a bifunctional ruthenium complex as an efficient catalyst for RAFT controlled photopolymerization and a sensing probe for the facile fabrication of an ECL platform
Source: Royal Society of Chemistry journal article supplement (doi:10.1039/c6py01016d), 2016-01-01
Supplement: c6py01016d1.pdf [file c6py01016d1.pdf]

**Supporting Information for:**

**Utilization of bifunctional ruthenium complex as efficient catalyst for  
RAFT controlled photopolymerization and simultaneously sensing  
probe for facile fabrication of ECL platform**

*Tao Chen<sup>1</sup>, Yuanhong Xu<sup>1\*</sup>, Zhi Peng, Aihua Li, Jingquan Liu\**

Center for Micro/Nano Luminescent and Electrochemical Materials, College of  
Materials Science and Engineering; Institute for Graphene Applied Technology  
Innovation; Laboratory of Fiber Materials and Modern Textiles, the Growing Base for  
State Key Laboratory; Collaborative Innovation Center for Marine Biomass Fibers  
Materials and Textiles of Shandong Province, Qingdao University, Qingdao 266071 ,  
China

Fax/Tel: 86-532-83780128

E-Mail: yhxu@qdu.edu.cn (Y. H. Xu) and jliu@qdu.edu.cn (J. Q. Liu)

*<sup>1</sup>Tao Chen and Yuanhong Xu contributed equally to this work.*

**Table S1. Parameters of the prepared polymers in the absence of visible light illumination.**

| Entry | SSS/PCETP/Ru    | Time (h) | Con <sup>c</sup> (%) | Mn <sup>b</sup> | Mn <sup>a</sup> | Đ <sup>a</sup> |
|-------|-----------------|----------|----------------------|-----------------|-----------------|----------------|
| 1     | 50 : 1 : 0.040  | 24       | 0                    | 0               | 0               | 0              |
| 2     | 100 : 1 : 0.040 | 24       | 0                    | 0               | 0               | 0              |
| 3     | 200 : 1 : 0.040 | 24       | 0                    | 0               | 0               | 0              |
| 4     | 400 : 1 : 0.040 | 24       | 0                    | 0               | 0               | 0              |

**Table S2. Parameters of PSS (Entry 10) via Ru-complex catalyzed photopolymerizations**

| Time (h) | Conversion <sup>c</sup> (%) | Mn <sup>a</sup> (g/mol) | Đ <sup>a</sup> | Mn <sup>c</sup> (g/mol) | Mn <sup>b</sup> (g/mol) |
|----------|-----------------------------|-------------------------|----------------|-------------------------|-------------------------|
| 1        | 9.9                         | 4400                    | 1.19           | 4300                    | 4600                    |
| 2        | 17.4                        | 7600                    | 1.20           | 7400                    | 7800                    |
| 3        | 22.5                        | 9500                    | 1.20           | 9300                    | 9700                    |
| 4        | 31.3                        | 12200                   | 1.20           | 11600                   | 13400                   |
| 8        | 45.4                        | 18700                   | 1.21           | 17600                   | 19200                   |
| 12       | 57.6                        | 23000                   | 1.22           | 21800                   | 24200                   |
| 16       | 64.9                        | 25600                   | 1.22           | 23900                   | 27200                   |
| 20       | 71.6                        | 28300                   | 1.24           | 27500                   | 30000                   |
| 24       | 76.6                        | 31200                   | 1.24           | 29200                   | 32100                   |

Notes: (a) The experimental Mn and the Đ measured by GPC using PEG standard (b) Theoretical calculated value (c) The experimental Mn was calculated from <sup>1</sup>H NMR spectra of the polymerization mixture in D<sub>2</sub>O.

**Table S3. Parameters of PSS via Ru-complex catalyzed photopolymerizations and the ECL intensity**

| Sample | CETP/SSS | Conversion <sup>c</sup> (%) | Mn <sup>b</sup> | Mn <sup>a</sup> | PDI <sup>b</sup> | ECL intensity |
|--------|----------|-----------------------------|-----------------|-----------------|------------------|---------------|
| 1      | 1:50     | 59.2                        | 6500            | 6800            | 1.21             | 1519          |
| 2      | 1:100    | 64.2                        | 13700           | 12500           | 1.22             | 2020          |
| 3      | 1:150    | 66.3                        | 21000           | 20100           | 1.24             | 2406          |
| 4      | 1:200    | 76.6                        | 32100           | 31200           | 1.23             | 2913          |
| 5      | 1:250    | 71.2                        | 37200           | 35400           | 1.24             | 3149          |
| 6      | 1:300    | 73.8                        | 46120           | 42800           | 1.24             | 3276          |
| 7      | 1:350    | 76.2                        | 55000           | 53200           | 1.22             | 3356          |
| 8      | 1:400    | 75.2                        | 62500           | 58200           | 1.24             | 3532          |

(a) Theoretical calculated value (b) The experimental Mn and the PDI measured by GPC using PEG standard (c) The experimental conversion was calculated from <sup>1</sup>H NMR spectra of the polymerization mixture in D<sub>2</sub>O.

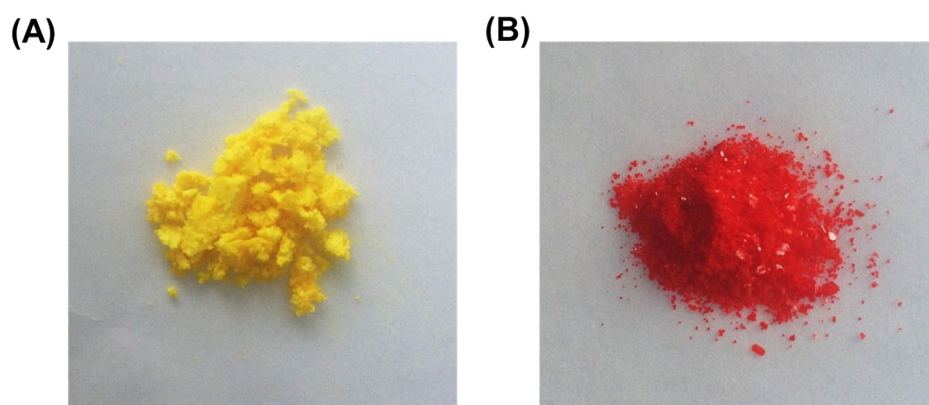

**Figure S1.** Photographs of (A) PCETP and (B) Ru(bpy)<sub>3</sub>Cl<sub>2</sub>·6H<sub>2</sub>O

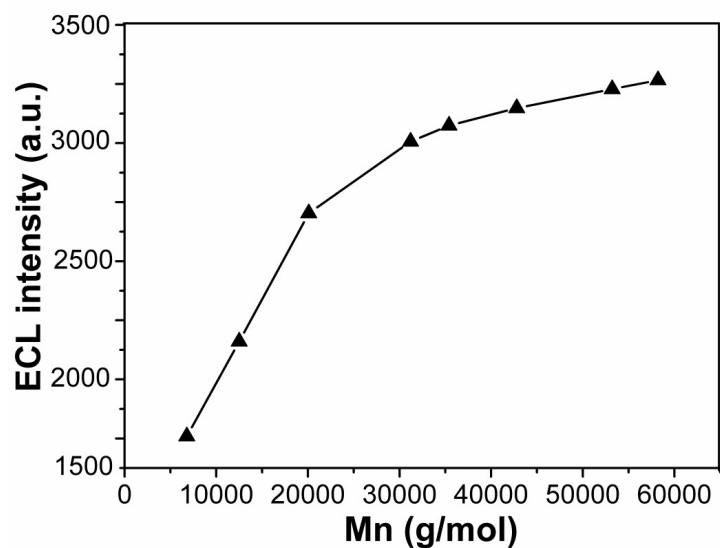

**Figure S2.** ECL intensity versus different Mn of PSS

### RAFT polymerization of PSS

The PCETP (23.9 mg,  $5.0 \times 10^{-2}$  mmol), SSS (2.06 g, 10 mmol) and AIBN (2.8 mg,  $1.7 \times 10^{-2}$  mmol) were dissolved in the mixture of 1, 4-dioxane (3.5 mL) and ultrapure water (3.5 mL) in a round-bottom flask. The resulting mixture was deoxygenated for 30 min using highly pure nitrogen, followed by the stirring at 75 °C for 10 h in a preheated oil bath. The obtained PSS was purified by dialyzing in ultrapure water for 3 days before vacuum drying.

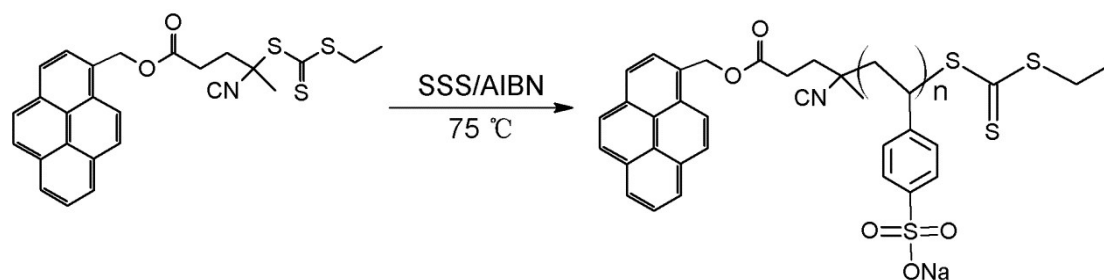

**Scheme S1.** RAFT polymerization process of PSS
